# Supplementary material
Source: publisher site journal article supplement (https://static.cambridge.org/content/id/urn:cambridge.org:id:article:S104795111900088X/resource/name/S104795111900088Xsupp0001.docx)
Supplement: Supplementary file 1 [file S104795111900088Xsupp0001.docx]

**Supplemental Table.** Survey questions organized into themes with correct answers bolded.

|  | **Pre-Test**  **Percentage Correct***  **(n=42)** | **Post-Test Percentage Correct***  **(n=30)** | **p-value** |
| --- | --- | --- | --- |
| **OVERALL (22 questions)** | 68.8% + 10.3% | 79.2% + 16.2% | 0.009 |
| **Cancer treatment-related risks (6 questions)** | 71.8% + 17.1% | 84.2% + 18.3% | 0.008 |
| Dexrazoxane, an agent hypothesized to minimize cardiac injury and remodeling, has been shown to minimize risk for cardiotoxicity in the pediatric population[1-3].   1. **True** 2. False | 48.8% | 82.8% | 0.020 |
| The risk for cardiac dysfunction decreases with time since treatment[4].   1. True 2. **False** | 52.4% | 93.1% | 0.002 |
| Which of the following chemotherapies are most commonly associated with cardiac toxicities such as cardiomyopathy, arrhythmias, and subclinical left ventricular dysfunction[4, 5]?   1. Alkylating agents 2. Antimetabolites 3. **Anthracycline antibiotics** 4. All of the above | 73.8% | 80.0% | 0.414 |
| Patients who are older at the time of exposure to anthracylines or radiation are more vulnerable to cardiac damage[4].   1. True 2. **False** | 76.2% | 75.9% | 0.706 |
| Which of the following radiation fields involve the heart and place a patient at risk for cardiac late effects[4, 6, 7]?   1. Chest and thorax 2. Hepatic 3. Mantle 4. Inverted Y 5. Total Body Irradiation 6. **All of the above** | 85.7% | 83.3% | 0.739 |
| All anthracyclines are equipotent milligram for milligram in terms of toxicity to the myocardium[4].   1. True 2. **False** | 93.9% | 90.0% | 1.000 |
| **Patient-related risk factors (6 questions)** | 59.1% + 19.9% | 71.0% + 21.8% | 0.066 |
| Survivors in their 30s are more likely to develop obesity as measured by body mass index than their siblings[8, 9].   1. True 2. **False** | 12.2% | 30.0% | 0.057 |
| Males are at higher risk for cardiac late effects[4].   1. True 2. **False** | 55.0% | 63.3% | 0.739 |
| Which of the following cardiovascular risk factors/components of the metabolic syndrome increases the risk for cardiac dysfunction the most in survivors[9]?   1. Obesity 2. Hyperlipidemia 3. **Hypertension** 4. Impaired glucose tolerance | 59.5% | 67.8% | 0.405 |
| African American patients are more at risk for cardiac late effects[4].   1. **True** 2. False | 65.0% | 93.3% | 0.035 |
| In survivors who are at risk for congestive heart failure due to cardiotoxic cancer treatment, hypertension imparts an additional risk that is[9]:   1. Less than additive 2. Additive 3. **More than additive** | 73.2% | 75.9% | 0.763 |
| Survivors in their 30s when compared to siblings are more likely to develop cardiovascular risk factors (metabolic syndrome)[8, 9].   1. **True** 2. False | 97.6% | 96.4% | 0.317 |
| **Recommended Surveillance (3 questions)** | 49.6% + 26.7% | 66.7% + 27.7% | 0.025 |
| Patients who received ≥ 300 mg/m2 of anthracycline or < 300 mg/m2 of anthracycline and chest radiation who become pregnant need echocardiograms periodically during pregnancy especially during[4]:   1. First trimester 2. Last trimester 3. During labor and delivery 4. A and C 5. **B and C** 6. All of the above | 19.1% | 41.4% | 0.134 |
| What variables are used in the Children’s Oncology Group Long-Term Follow-Up Guidelines to determine the frequency of echocardiographic surveillance[10, 11]?   1. Gender 2. Age at treatment 3. Current age 4. Radiation dose 5. Anthracycline dose 6. Previous echocardiogram showing dysfunction 7. D and E 8. C , D and E 9. **B, D, E and F** 10. All of the above | 45.2% | 56.7% | 0.405 |
| There is a web-based risk assessment tool that will calculate the risk for developing congestive heart failure by age 40 in survivors based on their demographics and cancer treatment[12].   1. **True** 2. False | 85.4% | 100.0% | 0.025 |
| **Cardiac-specific Considerations (6 questions)** | 88.1% + 16.0% | 91.3% + 15.5% | 0.255 |
| Which of the following cardiac conditions are late effects of cancer treatment[4]?   1. Cardiomyopathy/Congestive heart failure 2. Pericardial fibrosis 3. Valvular disease 4. Atherosclerotic heart disease 5. Arrhythmias 6. **All of the above** | 61.9% | 80.0% | 0.070 |
| Cancer survivors at high risk for cardiomyopathy with normal systolic function have been shown to have important differences in other measures that separate them from low risk patients. These include[13]:   1. End Systolic Wall Stress (ESWS) 2. LVEDD 3. LV mass 4. Tissue doppler 5. **All of the above** | 75.6% | 82.8% | 0.405 |
| In literature regarding cardiac surveillance of cancer survivors, the following serum biomarkers are elevated even in the absence of significant left ventricular dysfunction[14-16]:   1. Galectin 3 2. Protein ST2 3. Troponin 4. **NT-proBNP** | 82.5% | 88.9% | 0.706 |
| High risk individuals should have aerobic exercise limitations in the absence of cardiomyopathy to prevent changes in wall thickness[17, 18].   1. True 2. **False** | 83.3% | 85.7% | 0.414 |
| In long-term survivors of childhood cancer, a leading cause of morbidity and mortality – after cancer recurrence and secondary malignancies – is cardiovascular-related disease[19, 20].   1. **True** 2. False | 97.6% | 100.0% | 0.326 |
| Given the intense physical demands of varsity athletics, cancer survivors at risk for cardiac late effects should be evaluated by a cardiologist prior to sports participation[21, 22].   1. **True** 2. False | 100.0% | 96.4% | 0.317 |

* Overall and theme percentages represent average percentage correct +/- standard deviation.

1. Wexler, L.H., et al., *Randomized trial of the cardioprotective agent ICRF-187 in pediatric sarcoma patients treated with doxorubicin.* J Clin Oncol, 1996. **14**(2): p. 362-72.

2. Lipshultz, S.E., et al., *The effect of dexrazoxane on myocardial injury in doxorubicin-treated children with acute lymphoblastic leukemia.* N Engl J Med, 2004. **351**(2): p. 145-53.

3. Lipshultz, S.E., et al., *Assessment of dexrazoxane as a cardioprotectant in doxorubicin-treated children with high-risk acute lymphoblastic leukaemia: long-term follow-up of a prospective, randomised, multicentre trial.* Lancet Oncol, 2010. **11**(10): p. 950-961.

4. *Children's Oncology Group Long-Term Follow-Up Guidelines for Survivors of Childhood, Adolescent and Young Adult Cancer*. 2013; Available from: <http://www.survivorshipguidelines.org/pdf/LTFUGuidelines_40.pdf>.

5. Blanco, J.G., et al., *Anthracycline-Related Cardiomyopathy After Childhood Cancer: Role of Polymorphisms in Carbonyl Reductase Genes — A Report From the Children’ s Oncology Group.* Journal of Clinical Oncology, 2012. **30**(13): p. 1415-1421.

6. Armstrong, G.T., et al., *Comprehensive Echocardiographic Detection of Treatment-Related Cardiac Dysfunction in Adult Survivors of Childhood Cancer: Results From the St. Jude Lifetime Cohort Study.* J Am Coll Cardiol, 2015. **65**(23): p. 2511-22.

7. van der Pal, H.J., et al., *High risk of symptomatic cardiac events in childhood cancer survivors.* J Clin Oncol, 2012. **30**(13): p. 1429-37.

8. Meacham, L.R., et al., *Cardiovascular risk factors in adult survivors of pediatric cancer--a report from the childhood cancer survivor study.* Cancer Epidemiol Biomarkers Prev, 2010. **19**(1): p. 170-81.

9. Armstrong, G.T., et al., *Modifiable risk factors and major cardiac events among adult survivors of childhood cancer.* Journal of clinical oncology : official journal of the American Society of Clinical Oncology, 2013. **31**(29): p. 3673-3680.

10. Hudson, M.M., et al., *Noninvasive evaluation of late anthracycline cardiac toxicity in childhood cancer survivors.* Journal of Clinical Oncology, 2007. **25**(24): p. 3635-3643.

11. Mulrooney, D.A., et al., *Cardiac outcomes in a cohort of adult survivors of childhood and adolescent cancer: retrospective analysis of the Childhood Cancer Survivor Study cohort.* The BMJ, 2009. **339**: p. b4606.

12. Chow, E.J., et al., *Individual Prediction of Heart Failure Among Childhood Cancer Survivors.* Journal of Clinical Oncology, 2015. **33**(5): p. 394-402.

13. Plana, J.C., et al., *Expert Consensus for Multimodality Imaging Evaluation of Adult Patients during and after Cancer Therapy : A Report from the American Society of Echocardiography and the European Association of Cardiovascular Imaging.* JASE, 2014. **27**(9): p. 911-939.

14. Aggarwal, S., et al., *B-Type Natriuretic Peptide as a Marker for Cardiac Dysfunction in Anthracycline-Treated Children.* Pediatr Blood Cancer, 2007. **49**: p. 812-816.

15. Mavinkurve-Groothuis, A.M., et al., *Abnormal NT-pro-BNP levels in asymptomatic long-term survivors of childhood cancer treated with anthracyclines.* Pediatr Blood Cancer, 2009. **52**(5): p. 631-6.

16. Lipshultz, S.E., et al., *Long-term cardiovascular toxicity in children, adolescents, and young adults who receive cancer therapy: pathophysiology, course, monitoring, management, prevention, and research directions: a scientific statement from the American Heart Association.* Circulation, 2013. **128**(17): p. 1927-95.

17. Miller, A.M., et al., *Exercise Capacity in Long-Term Survivors of Pediatric Cancer : An Analysis From the Cardiac Risk Factors in Childhood Cancer Survivors Study.* 2013(November 2012): p. 663-668.

18. Huang, T.T. and K.K. Ness, *Exercise interventions in children with cancer: a review.* International journal of pediatrics, 2011. **2011**: p. 1-11.

19. Armstrong, G.T., et al., *Reduction in Late Mortality among 5-Year Survivors of Childhood Cancer.* N Engl J Med, 2016. **374**(9): p. 833-42.

20. Armstrong, G.T., et al., *Aging and risk of severe, disabling, life-threatening, and fatal events in the childhood cancer survivor study.* Journal of Clinical Oncology, 2014. **32**(12): p. 1218-1227.

21. Ryerson, A.B., et al., *Assessing anthracycline-treated childhood cancer survivors with advanced stress echocardiography.* Pediatr Blood Cancer, 2015. **62**(3): p. 502-8.

22. Armenian, S.H., et al., *Recommendations for cardiomyopathy surveillance for survivors of childhood cancer: a report from the International Late Effects of Childhood Cancer Guideline Harmonization Group.* The Lancet. Oncology, 2015. **16**(3): p. e123-e136.
